# Supplementary material
Source: PubMed Central journal article supplement (PMC2638880)
Supplement: ern195_1.pdf [file ern195_1.pdf]

**Table S2** Groups of functionally related genes that are differentially regulated in response to Mn deficiency

| Function           | Gene locus | Annotation                        | +Mn Baseline<br>Signal | -Mn Chip<br>Signal | Fold<br>change |
|--------------------|------------|-----------------------------------|------------------------|--------------------|----------------|
| Cell specification |            |                                   |                        |                    |                |
|                    | At1g79840  | GLABRA2 (GL2)                     | 341                    | 337                | 1.0            |
|                    | At5g14750  | WEREWOLF (WER)                    | 193                    | 187                | 1.0            |
|                    | At1g01380  | ENHANCER OF TRY AND CPC 1 (ETC1)  | 38                     | 28                 | -1.4           |
|                    | At5g24520  | TRANSPARENT TESTA GLABRA 1 (TTG1) | 555                    | 446                | -1.2           |
|                    | At1g63650  | ENHANCER OF GLABRA3 (EGL3)        | 135                    | 114                | -1.2           |
|                    | At2g46410  | CAPRICE (CPC)                     | 193                    | 187                | 1.0            |
|                    | At1g11130  | SCRAMBLED (SCM)                   | 75                     | 106                | 1.4            |
|                    | At5g51060  | ROOT HAIR DEFECTIVE 2 (RHD2)      | 932                    | 927                | 1.0            |
| Iron homeostasis   |            |                                   |                        |                    |                |
|                    | At4g19690  | Fe(II) transport protein (IRT1)   | 4832                   | 2448               | -2.0           |
|                    | At5g01600  | Ferritin 1 (ATFER1)               | 3365                   | 5102               | 1.5            |
|                    | At1g23020  | Fe(III) oxidoreductase (FRO3)     | 970                    | 852                | -1.1           |
|                    | At4g19680  | Fe(II) transport protein (IRT2)   | 379                    | 293                | -1.2           |
|                    | At2g28160  | Transcriptional regulator (FIT1)  | 1334                   | 1332               | 1.0            |
|                    | At1g34760  | 14-3-3 protein (GRF11)            | 579                    | 501                | -1.2           |
|                    | At1g47240  | NRAMP2                            | 553                    | 560                | 1.0            |

|                          |           |                                                   |      |      |      |
|--------------------------|-----------|---------------------------------------------------|------|------|------|
|                          | At1g80830 | NRAMP1                                            | 2558 | 2409 | -1.1 |
|                          | At2g23150 | NRAMP3                                            | 266  | 295  | 1.1  |
|                          | At5g67330 | NRAMP4                                            | 1085 | 1175 | 1.1  |
|                          | At5g03570 | Ferroportin                                       | 1171 | 959  | -1.2 |
|                          | At4g31940 | Cytochrome P450 (CYP82C)                          | 1006 | 481  | -2.1 |
|                          | At4g30120 | HEAVY METAL ATPASE 3 (HMA3)                       | 185  | 94   | -2.0 |
| Phosphate<br>homeostasis |           |                                                   |      |      |      |
|                          | At2g33770 | Ubiquitin-conjugating E2 enzyme (PHO2)            | 569  | 521  | -1.1 |
|                          | At2g38940 | Phosphate transporter (Pht1;4)                    | 724  | 660  | -1.1 |
|                          | At3g17790 | Acid phosphatase 5 (ACP5)                         | 131  | 98   | -1.3 |
|                          | At1g17710 | Phosphoric monoester hydrolase                    | 28   | 25   | -1.1 |
|                          | At4g08290 | Nodulin MtN21 family protein                      | 203  | 202  | 1.0  |
|                          | At3g02040 | Glycerophosphodiester phosphodiesterase<br>(SRG3) | 160  | 175  | -1.1 |
|                          | At3g47420 | Glc-3-P permease                                  | 336  | 324  | 1.0  |
|                          | At5g20150 | SPX domain-containing protein                     | 226  | 294  | -1.3 |
